# Supplementary material for: Upregulation of Apoptosis Related Genes in Clinically Normal Tongue Contralateral to Squamous Cell Carcinoma of the Oral Tongue, an Effort to Maintain Tissue Homeostasis
Source: PubMed Central journal article supplement (PMC11442960; doi:10.1007/s12105-024-01695-6), 2024-09-30
Supplement: 12105_2024_1695_MOESM1_ESM.pdf [file 12105_2024_1695_MOESM1_ESM.pdf]

## Online Resource 1

### Head and Neck Pathology

#### **Upregulation of apoptosis related genes in clinically normal tongue contralateral to squamous cell carcinoma of the oral tongue, an effort to maintain tissue homeostasis**

Nima Attaran<sup>1,2</sup>, Philip J Coates<sup>3</sup>, Katarina Zborayova<sup>2</sup>, Nicola Sgaramella<sup>1,4</sup>, Karin Nylander<sup>1</sup>, Xiaolian Gu<sup>1</sup>

<sup>1</sup>Department of Medical Biosciences/Pathology, Umeå University, 90187, Umeå, Sweden

<sup>2</sup>Department of Clinical Sciences, Umeå University, 90187, Umeå, Sweden

<sup>3</sup>Research Centre for Applied Molecular Oncology (RECAMO), Masaryk Memorial Cancer Institute, 65653, Brno, Czech Republic

<sup>4</sup>Department of Oral and Maxillo-Facial Surgery, Mater Dei Hospital, 70125, Bari, Italy

#### **Corresponding Author**

Dr. Xiaolian Gu (ORCID: 0000-0002-6574-3628)

Department of Medical Biosciences/Pathology, Umeå University

Building 6M, 2<sup>nd</sup> floor, Analysvägen 9

90187, Umeå, Sweden

Phone: +46 90 785 2943

E-mail: [xiaolian.gu@umu.se](mailto:xiaolian.gu@umu.se)

**Supplementary Table 1** Clinical data on participants underwent microarray analysis

| #  | ID   | Sample          | Age (years) | Sex    | TNM      |
|----|------|-----------------|-------------|--------|----------|
| 1  | p40  | NTCT            | 80          | Female | T4N2bM0  |
| 2  | p42  | NTCT            | 68          | Female | T2N0M0   |
| 3  | p14  | Tumor           | 77          | Female | T2N1M0   |
| 4  | p24  | Tumor           | 64          | Male   | T1N0M0   |
| 5  | p29  | Tumor           | 64          | Female | T2N0M0   |
| 6  | p68  | Tumor           | 62          | Male   | T2N0M0   |
| 7  | p70  | Tumor           | 71          | Male   | T1N0M0   |
| 8  | p82  | Tumor           | 19          | Female | T4N0M0   |
| 9  | p83  | Tumor           | 64          | Female | T1N0M0   |
| 10 | p92  | Tumor           | 63          | Female | T2N0M0   |
| 11 | p11  | NTCT & Tumor    | 78          | Male   | T2N0M0   |
| 12 | p35  | NTCT & Tumor    | 24          | Female | T2N0M0   |
| 13 | p49  | NTCT & Tumor    | 52          | Female | T4N2cM0  |
| 14 | p51  | NTCT & Tumor    | 74          | Male   | T2N0M0   |
| 15 | p56  | NTCT & Tumor    | 40          | Female | T2N2bM0  |
| 16 | p58  | NTCT & Tumor    | 61          | Male   | T1N0M0   |
| 17 | p59  | NTCT & Tumor    | 68          | Female | T2N0M0   |
| 18 | p61  | NTCT & Tumor    | 69          | Male   | T4aN0M0  |
| 19 | p65  | NTCT & Tumor    | 81          | Female | T2N0M0   |
| 20 | p73  | NTCT & Tumor    | 80          | Male   | T4aN0M0  |
| 21 | p76  | NTCT & Tumor    | 58          | Male   | T4aN0M0  |
| 22 | p79  | NTCT & Tumor    | 60          | Male   | T1N0M0   |
| 23 | p85  | NTCT & Tumor    | 87          | Female | T2N0M0   |
| 24 | p98  | NTCT & Tumor    | 31          | Male   | T2N0M0   |
| 25 | p105 | NTCT & Tumor    | 63          | Male   | T1N0M0   |
| 26 | p111 | NTCT & Tumor    | 31          | Female | T1N0M0   |
| 27 | p119 | NTCT & Tumor    | 66          | Male   | T2N0M0   |
| 28 | p124 | NTCT & Tumor    | 54          | Male   | T4aN2bM0 |
| 29 | p131 | NTCT & Tumor    | 74          | Female | T2N0M0   |
| 30 | p137 | NTCT & Tumor    | 71          | Female | T2N0M0   |
| 31 | p138 | NTCT & Tumor    | 50          | Male   | T2N1M0   |
| 32 | H1   | Healthy control | 32          | Female |          |
| 33 | H2   | Healthy control | 49          | Female |          |
| 34 | H3   | Healthy control | 25          | Female |          |
| 35 | H4   | Healthy control | 30          | Male   |          |
| 36 | H5   | Healthy control | 27          | Male   |          |
| 37 | H6   | Healthy control | 42          | Female |          |
| 38 | H7   | Healthy control | 32          | Female |          |
| 39 | H8   | Healthy control | 41          | Female |          |
| 40 | H9   | Healthy control | 35          | Female |          |
| 41 | H10  | Healthy control | 57          | Male   |          |
| 42 | H11  | Healthy control | 45          | Male   |          |
| 43 | H12  | Healthy control | 37          | Male   |          |
| 44 | H13  | Healthy control | 48          | Female |          |
| 45 | H14  | Healthy control | 59          | Female |          |

NTCT = clinically normal tongue tissue contralateral to tumor

**Supplementary Table 2** Clinical data on patients underwent RNA and Whole Exome Sequencing

| #  | ID   | Age (years) | Sex    | TNM      | HPV status |
|----|------|-------------|--------|----------|------------|
| 1  | p98  | 31          | Male   | T2N0M0   | 0          |
| 2  | p105 | 63          | Male   | T1N0M0   | 0          |
| 3  | p111 | 31          | Female | T1N0M0   | 0          |
| 4  | p119 | 67          | Male   | T2N0M0   | 0          |
| 5  | p124 | 54          | Male   | T4aN2bM0 | 0          |
| 6  | p131 | 74          | Female | T2N0M0   | 0          |
| 7  | p137 | 71          | Female | T2N0M0   | 0          |
| 8  | p138 | 50          | Male   | T2N1M0   | 0          |
| 9  | p149 | 69          | Female | T1N0M0   | 0          |
| 10 | p154 | 42          | Female | T1N1M0   | 0          |
| 11 | p156 | 65          | Male   | T1N0M0   | 0          |
| 12 | p157 | 68          | Male   | T1N0M0   | 1          |
| 13 | p187 | 73          | Female | T1N0M0   | 0          |
| 14 | p212 | 52          | Male   | T4aN2bM0 | 0          |
| 15 | p213 | 72          | Female | T2N0M0   | 0          |

HPV, human papillomavirus; 0 = negative; 1 = positive

**Supplementary Table 3** List of the discriminant genes

| #  | Probe ID     | Symbol  | PLS-DA  |       | ComparativeMarkerSelection |       |                 |       |                           |       |
|----|--------------|---------|---------|-------|----------------------------|-------|-----------------|-------|---------------------------|-------|
|    |              |         | p(corr) | VIP   | NTCT vs. Healthy control   |       | NTCT vs. Tumor  |       | Tumor vs. Healthy control |       |
|    |              |         |         |       | log fold change            | FDR   | log fold change | FDR   | log fold change           | FDR   |
| 1  | ILMN_1693401 | KLHL28  | 0.956   | 2.756 | 1.962                      | 0.003 | 0.777           | 0.003 | 1.185                     | 0.001 |
| 2  | ILMN_1699636 | ACIN1   | 0.943   | 2.609 | 0.881                      | 0.003 | 0.213           | 0.118 | 0.668                     | 0.001 |
| 3  | ILMN_1675130 | NFIC    | 0.935   | 2.521 | 1.834                      | 0.003 | 1.283           | 0.001 | 0.551                     | 0.035 |
| 4  | ILMN_2321064 | BAX     | 0.931   | 2.614 | 1.458                      | 0.003 | 0.402           | 0.039 | 1.860                     | 0.001 |
| 5  | ILMN_2333107 | TLE5    | 0.927   | 2.639 | 1.043                      | 0.003 | 0.851           | 0.001 | 0.191                     | 0.326 |
| 6  | ILMN_1805996 | SIN3A   | 0.927   | 2.584 | 0.604                      | 0.003 | 0.012           | 0.941 | 0.592                     | 0.001 |
| 7  | ILMN_2408039 | EEF1D   | 0.923   | 2.517 | 0.700                      | 0.003 | 0.045           | 0.805 | 0.745                     | 0.001 |
| 8  | ILMN_2060115 | SORL1   | 0.923   | 2.542 | 0.975                      | 0.003 | 0.318           | 0.136 | 1.293                     | 0.001 |
| 9  | ILMN_1658472 | APH1A   | 0.923   | 2.749 | 1.943                      | 0.003 | 0.617           | 0.001 | 1.326                     | 0.001 |
| 10 | ILMN_1713156 | MSL3    | 0.919   | 2.546 | 1.692                      | 0.003 | 0.137           | 0.689 | 1.555                     | 0.001 |
| 11 | ILMN_1730879 | CBY1    | 0.916   | 2.652 | 0.527                      | 0.003 | 0.332           | 0.001 | 0.195                     | 0.021 |
| 12 | ILMN_1724825 | PCBP2   | 0.916   | 2.669 | 0.950                      | 0.003 | 0.314           | 0.035 | 0.636                     | 0.001 |
| 13 | ILMN_3227994 | ST13    | 0.916   | 2.520 | 1.105                      | 0.003 | 0.331           | 0.112 | 0.774                     | 0.001 |
| 14 | ILMN_1772876 | ZNF395  | 0.914   | 2.497 | 0.825                      | 0.003 | 1.228           | 0.001 | -0.403                    | 0.011 |
| 15 | ILMN_1767514 | ZC3H11A | 0.913   | 2.481 | 1.471                      | 0.003 | 0.268           | 0.366 | 1.203                     | 0.001 |
| 16 | ILMN_2323048 | ERP29   | 0.912   | 2.768 | 0.491                      | 0.003 | 0.021           | 0.854 | 0.469                     | 0.001 |
| 17 | ILMN_1734440 | VIPAS39 | 0.909   | 2.596 | 0.625                      | 0.003 | 0.201           | 0.060 | 0.424                     | 0.001 |
| 18 | ILMN_1793386 | MED12   | 0.907   | 2.454 | 0.658                      | 0.003 | 0.430           | 0.003 | 0.228                     | 0.094 |
| 19 | ILMN_1718309 | COX15   | 0.905   | 2.616 | 0.869                      | 0.003 | 0.698           | 0.001 | 0.172                     | 0.135 |
| 20 | ILMN_2406313 | RBCK1   | 0.903   | 2.570 | 0.843                      | 0.003 | 0.065           | 0.735 | 0.908                     | 0.001 |
| 21 | ILMN_2399304 | NAV2    | 0.903   | 2.432 | 1.212                      | 0.003 | 0.321           | 0.155 | 0.892                     | 0.001 |
| 22 | ILMN_1680831 | BAZ1B   | 0.900   | 2.504 | 0.508                      | 0.003 | 0.148           | 0.226 | 0.656                     | 0.001 |
| 23 | ILMN_2379835 | SUMO1   | -0.949  | 2.704 | -1.448                     | 0.003 | 0.402           | 0.036 | -1.046                    | 0.001 |
| 24 | ILMN_1768913 | TSN     | -0.935  | 2.635 | -1.137                     | 0.003 | 0.023           | 0.918 | -1.114                    | 0.001 |
| 25 | ILMN_2052383 | R3HDM1  | -0.934  | 2.608 | -1.000                     | 0.003 | 0.526           | 0.001 | -0.474                    | 0.001 |
| 26 | ILMN_2178618 | WDR44   | -0.934  | 2.622 | -1.050                     | 0.003 | 0.191           | 0.270 | -0.859                    | 0.001 |
| 27 | ILMN_2401933 | ATP2B1  | -0.934  | 2.681 | -1.038                     | 0.003 | 0.502           | 0.001 | -0.536                    | 0.002 |
| 28 | ILMN_2231985 | HSPA13  | -0.931  | 2.605 | -0.951                     | 0.003 | 0.695           | 0.001 | -0.256                    | 0.084 |
| 29 | ILMN_1668657 | C2orf69 | -0.930  | 2.693 | -1.113                     | 0.003 | 0.121           | 0.449 | -0.993                    | 0.001 |
| 30 | ILMN_2059452 | SLC12A2 | -0.929  | 2.632 | -1.580                     | 0.003 | 0.623           | 0.011 | -0.957                    | 0.001 |
| 31 | ILMN_2116556 | LSM5    | -0.926  | 2.502 | -1.242                     | 0.003 | 0.511           | 0.019 | -0.732                    | 0.001 |

|    |              |         |        |       |        |       |       |       |        |       |
|----|--------------|---------|--------|-------|--------|-------|-------|-------|--------|-------|
| 32 | ILMN_2205350 | NDUFAF4 | -0.924 | 2.634 | -1.102 | 0.003 | 0.191 | 0.330 | -0.911 | 0.001 |
| 33 | ILMN_2069821 | FAM241A | -0.923 | 2.719 | -1.220 | 0.003 | 0.066 | 0.719 | -1.154 | 0.001 |
| 34 | ILMN_3225244 | TSEN15  | -0.922 | 2.505 | -1.270 | 0.003 | 0.245 | 0.293 | -1.025 | 0.001 |
| 35 | ILMN_2168992 | FBXO30  | -0.922 | 2.520 | -1.067 | 0.003 | 0.436 | 0.034 | -0.631 | 0.001 |
| 36 | ILMN_1663646 | DMXL1   | -0.921 | 2.464 | -1.135 | 0.003 | 0.280 | 0.133 | -1.415 | 0.001 |
| 37 | ILMN_2103014 | CFAP36  | -0.921 | 2.733 | -0.712 | 0.003 | 0.059 | 0.505 | -0.654 | 0.001 |
| 38 | ILMN_2066348 | HERPUD2 | -0.920 | 2.693 | -1.083 | 0.003 | 0.049 | 0.819 | -1.133 | 0.001 |
| 39 | ILMN_1700975 | ENSA    | -0.915 | 2.617 | -1.225 | 0.003 | 0.505 | 0.001 | -1.730 | 0.001 |
| 40 | ILMN_1739583 | ROCK1   | -0.914 | 2.646 | -0.981 | 0.003 | 0.274 | 0.048 | -0.707 | 0.001 |
| 41 | ILMN_2063584 | CLIC4   | -0.912 | 2.664 | -1.180 | 0.003 | 1.257 | 0.001 | 0.078  | 0.688 |
| 42 | ILMN_1679127 | CCAR1   | -0.912 | 2.537 | -1.034 | 0.003 | 0.303 | 0.040 | -0.732 | 0.001 |
| 43 | ILMN_1692116 | ZBTB8OS | -0.912 | 2.550 | -1.029 | 0.003 | 0.294 | 0.067 | -0.734 | 0.001 |
| 44 | ILMN_2223720 | ATMIN   | -0.909 | 2.495 | -1.400 | 0.003 | 0.311 | 0.211 | -1.711 | 0.001 |
| 45 | ILMN_2128741 | RDH11   | -0.909 | 2.664 | -1.025 | 0.003 | 0.509 | 0.001 | -0.516 | 0.002 |
| 46 | ILMN_2231189 | MFSD14A | -0.908 | 2.580 | -1.120 | 0.003 | 0.270 | 0.135 | -0.850 | 0.001 |
| 47 | ILMN_1674458 | KLHL7   | -0.908 | 2.525 | -0.987 | 0.003 | 0.254 | 0.155 | -0.734 | 0.001 |
| 48 | ILMN_1704261 | RANGRF  | -0.908 | 2.586 | -0.921 | 0.003 | 0.503 | 0.001 | -0.419 | 0.007 |
| 49 | ILMN_2065299 | EDEM3   | -0.907 | 2.525 | -0.834 | 0.003 | 0.327 | 0.016 | -0.507 | 0.001 |
| 50 | ILMN_1664718 | CYP51A1 | -0.907 | 2.495 | -1.350 | 0.003 | 0.172 | 0.492 | -1.522 | 0.001 |
| 51 | ILMN_2113074 | UFM1    | -0.907 | 2.505 | -1.213 | 0.003 | 0.071 | 0.798 | -1.142 | 0.001 |
| 52 | ILMN_2211672 | TSNAX   | -0.906 | 2.551 | -1.044 | 0.003 | 0.243 | 0.148 | -0.802 | 0.001 |
| 53 | ILMN_2183216 | TDP2    | -0.906 | 2.423 | -1.175 | 0.003 | 0.394 | 0.027 | -0.780 | 0.001 |
| 54 | ILMN_1658015 | MBNL2   | -0.906 | 2.457 | -1.265 | 0.003 | 0.390 | 0.094 | -0.875 | 0.001 |
| 55 | ILMN_2292387 | TANK    | -0.904 | 2.600 | -0.931 | 0.003 | 0.280 | 0.040 | -0.652 | 0.001 |
| 56 | ILMN_2172202 | NUDT15  | -0.903 | 2.433 | -1.061 | 0.003 | 0.503 | 0.004 | -0.558 | 0.001 |
| 57 | ILMN_1748911 | SNAP23  | -0.903 | 2.431 | -1.043 | 0.003 | 0.391 | 0.060 | -0.652 | 0.001 |
| 58 | ILMN_1781039 | VPS26A  | -0.902 | 2.445 | -1.227 | 0.003 | 0.070 | 0.819 | -1.297 | 0.001 |
| 59 | ILMN_3227563 | TMA7    | -0.902 | 2.463 | -0.900 | 0.003 | 0.421 | 0.019 | -1.322 | 0.001 |
| 60 | ILMN_2203896 | SMAD7   | -0.901 | 2.620 | -1.305 | 0.003 | 0.824 | 0.001 | -0.480 | 0.001 |
| 61 | ILMN_2183610 | SERAC1  | -0.900 | 2.562 | -0.908 | 0.003 | 0.302 | 0.007 | -1.210 | 0.001 |

PLS-DA = partial least-squares-discriminant analysis, p(corr) = correlation coefficient between model and original data, VIP = variable influence of projection, NTCT = clinically normal tongue tissue contralateral to tumor, FDR = false discovery rate
